# Supplementary material for: Antibody and Local Cytokine Response to Respiratory Syncytial Virus Infection in Community-Dwelling Older Adults
Source: PubMed Central journal article supplement (PMC7471002; doi:10.1128/msphere.00577-20), 2020-09-02
Supplement: mSphere.00577-20-st001.pdf [file mSphere.00577-20-st001.pdf]

| <b>Overall participants (MLPA, ELISA) - cohorts 2011/12, 2012/13, 2014/15 (Fig. 2B, 3, and S1A)</b> |                            |                                 |                    |
|-----------------------------------------------------------------------------------------------------|----------------------------|---------------------------------|--------------------|
|                                                                                                     | <b>No RSV<sup>a</sup></b>  | <b>RSV-infected</b>             | <b>P-value</b>     |
| Number (n)                                                                                          | 563                        | 41                              | NA                 |
| Age in years, mean (range)                                                                          | 69.1 (59-89) <sup>b</sup>  | 70.2 (60-88)                    | 0.51 <sup>d</sup>  |
| Female sex, number (%)                                                                              | 293 (54) <sup>c</sup>      | 23 (56)                         | 0.87 <sup>e</sup>  |
| RSV A, number (%)                                                                                   | 0 (0)                      | 21 (51)                         | NA                 |
| RSV B, number (%)                                                                                   | 0 (0)                      | 20 (49)                         | NA                 |
| <b>Subset tested for virus neutralization - cohorts 2011/12, 2012/13, 2014/15 (Fig. 2A,C,D)</b>     |                            |                                 |                    |
|                                                                                                     | <b>No RSV<sup>a</sup></b>  | <b>RSV-infected</b>             | <b>P-value</b>     |
| Number (n)                                                                                          | 197                        | 40                              | NA                 |
| Age in years, mean (range)                                                                          | 69.4 (59-89) <sup>b</sup>  | 70.2 (60-88)                    | 0.51 <sup>d</sup>  |
| Female sex, number (%)                                                                              | 111 (56)                   | 22 (55)                         | >0.99 <sup>e</sup> |
| RSV A, number (%)                                                                                   | 0 (0)                      | 21 (53)                         | NA                 |
| RSV B, number (%)                                                                                   | 0 (0)                      | 19 (48)                         | NA                 |
| <b>Subset with additional early recovery sample - cohort 2014/15 (Fig. 2E-F, and S1B)</b>           |                            |                                 |                    |
|                                                                                                     | <b>RSV-infected</b>        |                                 |                    |
| Number (n)                                                                                          | 16                         |                                 |                    |
| Age in years, mean (range)                                                                          | 71.8 (62-88)               |                                 |                    |
| Female sex, number (%)                                                                              | 10 (63)                    |                                 |                    |
| RSV A, number (%)                                                                                   | 7 (44)                     |                                 |                    |
| RSV B, number (%)                                                                                   | 9 (56)                     |                                 |                    |
| <b>Subset used for local IgA/cytokine analysis - cohort 2012/13 (Fig. 2G-H, 4, S1C-E, and S2A)</b>  |                            |                                 |                    |
|                                                                                                     | <b>Healthy<sup>f</sup></b> | <b>RSV-infected<sup>g</sup></b> | <b>P-value</b>     |
| Number (n)                                                                                          | 10                         | 10                              | NA                 |
| Age in years, mean (range)                                                                          | 68.6 (62-82)               | 68.3 (61-81)                    | 0.93 <sup>d</sup>  |
| Female sex, number (%)                                                                              | 5 (50)                     | 5 (50)                          | >0.99 <sup>e</sup> |
| RSV A, number (%)                                                                                   | 0 (0)                      | 7 (70)                          | NA                 |
| RSV B, number (%)                                                                                   | 0 (0)                      | 3 (30)                          | NA                 |
